# Supplementary material for: Downregulation of amplified in breast cancer 1 contributes to the anti-tumor effects of sorafenib on human hepatocellular carcinoma
Source: PubMed Central journal article supplement (PMC5045420; doi:10.18632/oncotarget.8812), 2016-04-18
Supplement: oncotarget-07-29605-s001.pdf [file oncotarget-07-29605-s001.pdf]

## SUPPLEMENTARY FIGURE AND TABLE

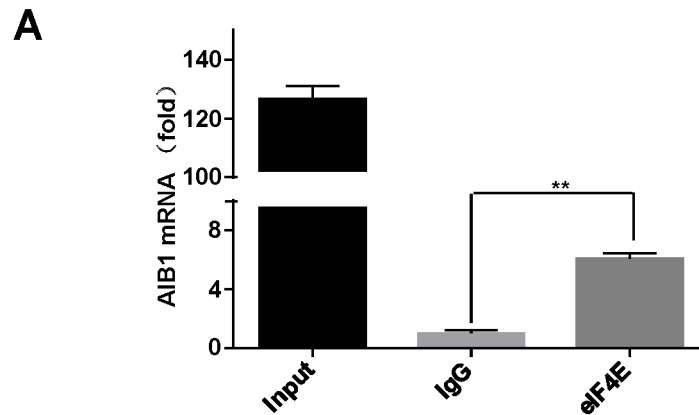

**Supplementary Figure S1: AIB1 mRNA interacts with eIF4E.** AIB1 mRNA was detected by real-time PCR after RNA immunoprecipitation using IgG or eIF4E antibody in HepG2 cells.

**Supplementary Table S1: Primers for real-time PCR**

| Primer           | Sequence               |
|------------------|------------------------|
| AIB1 forward     | GGCTTTGTCTCAACCCACT    |
| AIB1 reverse     | CTCATGCCGCCTACCGAAC    |
| GAPDH forward    | CACTCCTCCACCTTTGACGC   |
| GAPDH reverse    | TGCTGTAGCCAAATTCGTTGT  |
| MIF forward      | CGGACAGGGTCTACATCAA    |
| MIF reverse      | CGGCTCTTAGGCGAAGGTG    |
| Catalase forward | CTGTTGAAGATGCGGCGAGAC  |
| Catalase reverse | TCCTGTGGCAATGGCGTTA    |
| GCLC forward     | CGGACAAGAATACACCATCTCA |
| GCLC reverse     | ATACTGCAGGCTTGGAATGTC  |
| GCLM forward     | GGGAACCTGCTGAACTGG     |
| GCLM reverse     | CTGGGTTGATTTGGGA ACTC  |
